# Supplementary material
Source: bioRxiv or medRxiv preprint supplement (https://www.biorxiv.org/highwire/filestream/60229/field_highwire_adjunct_files/6/197855-5.pdf)

Supplemental Figure 5

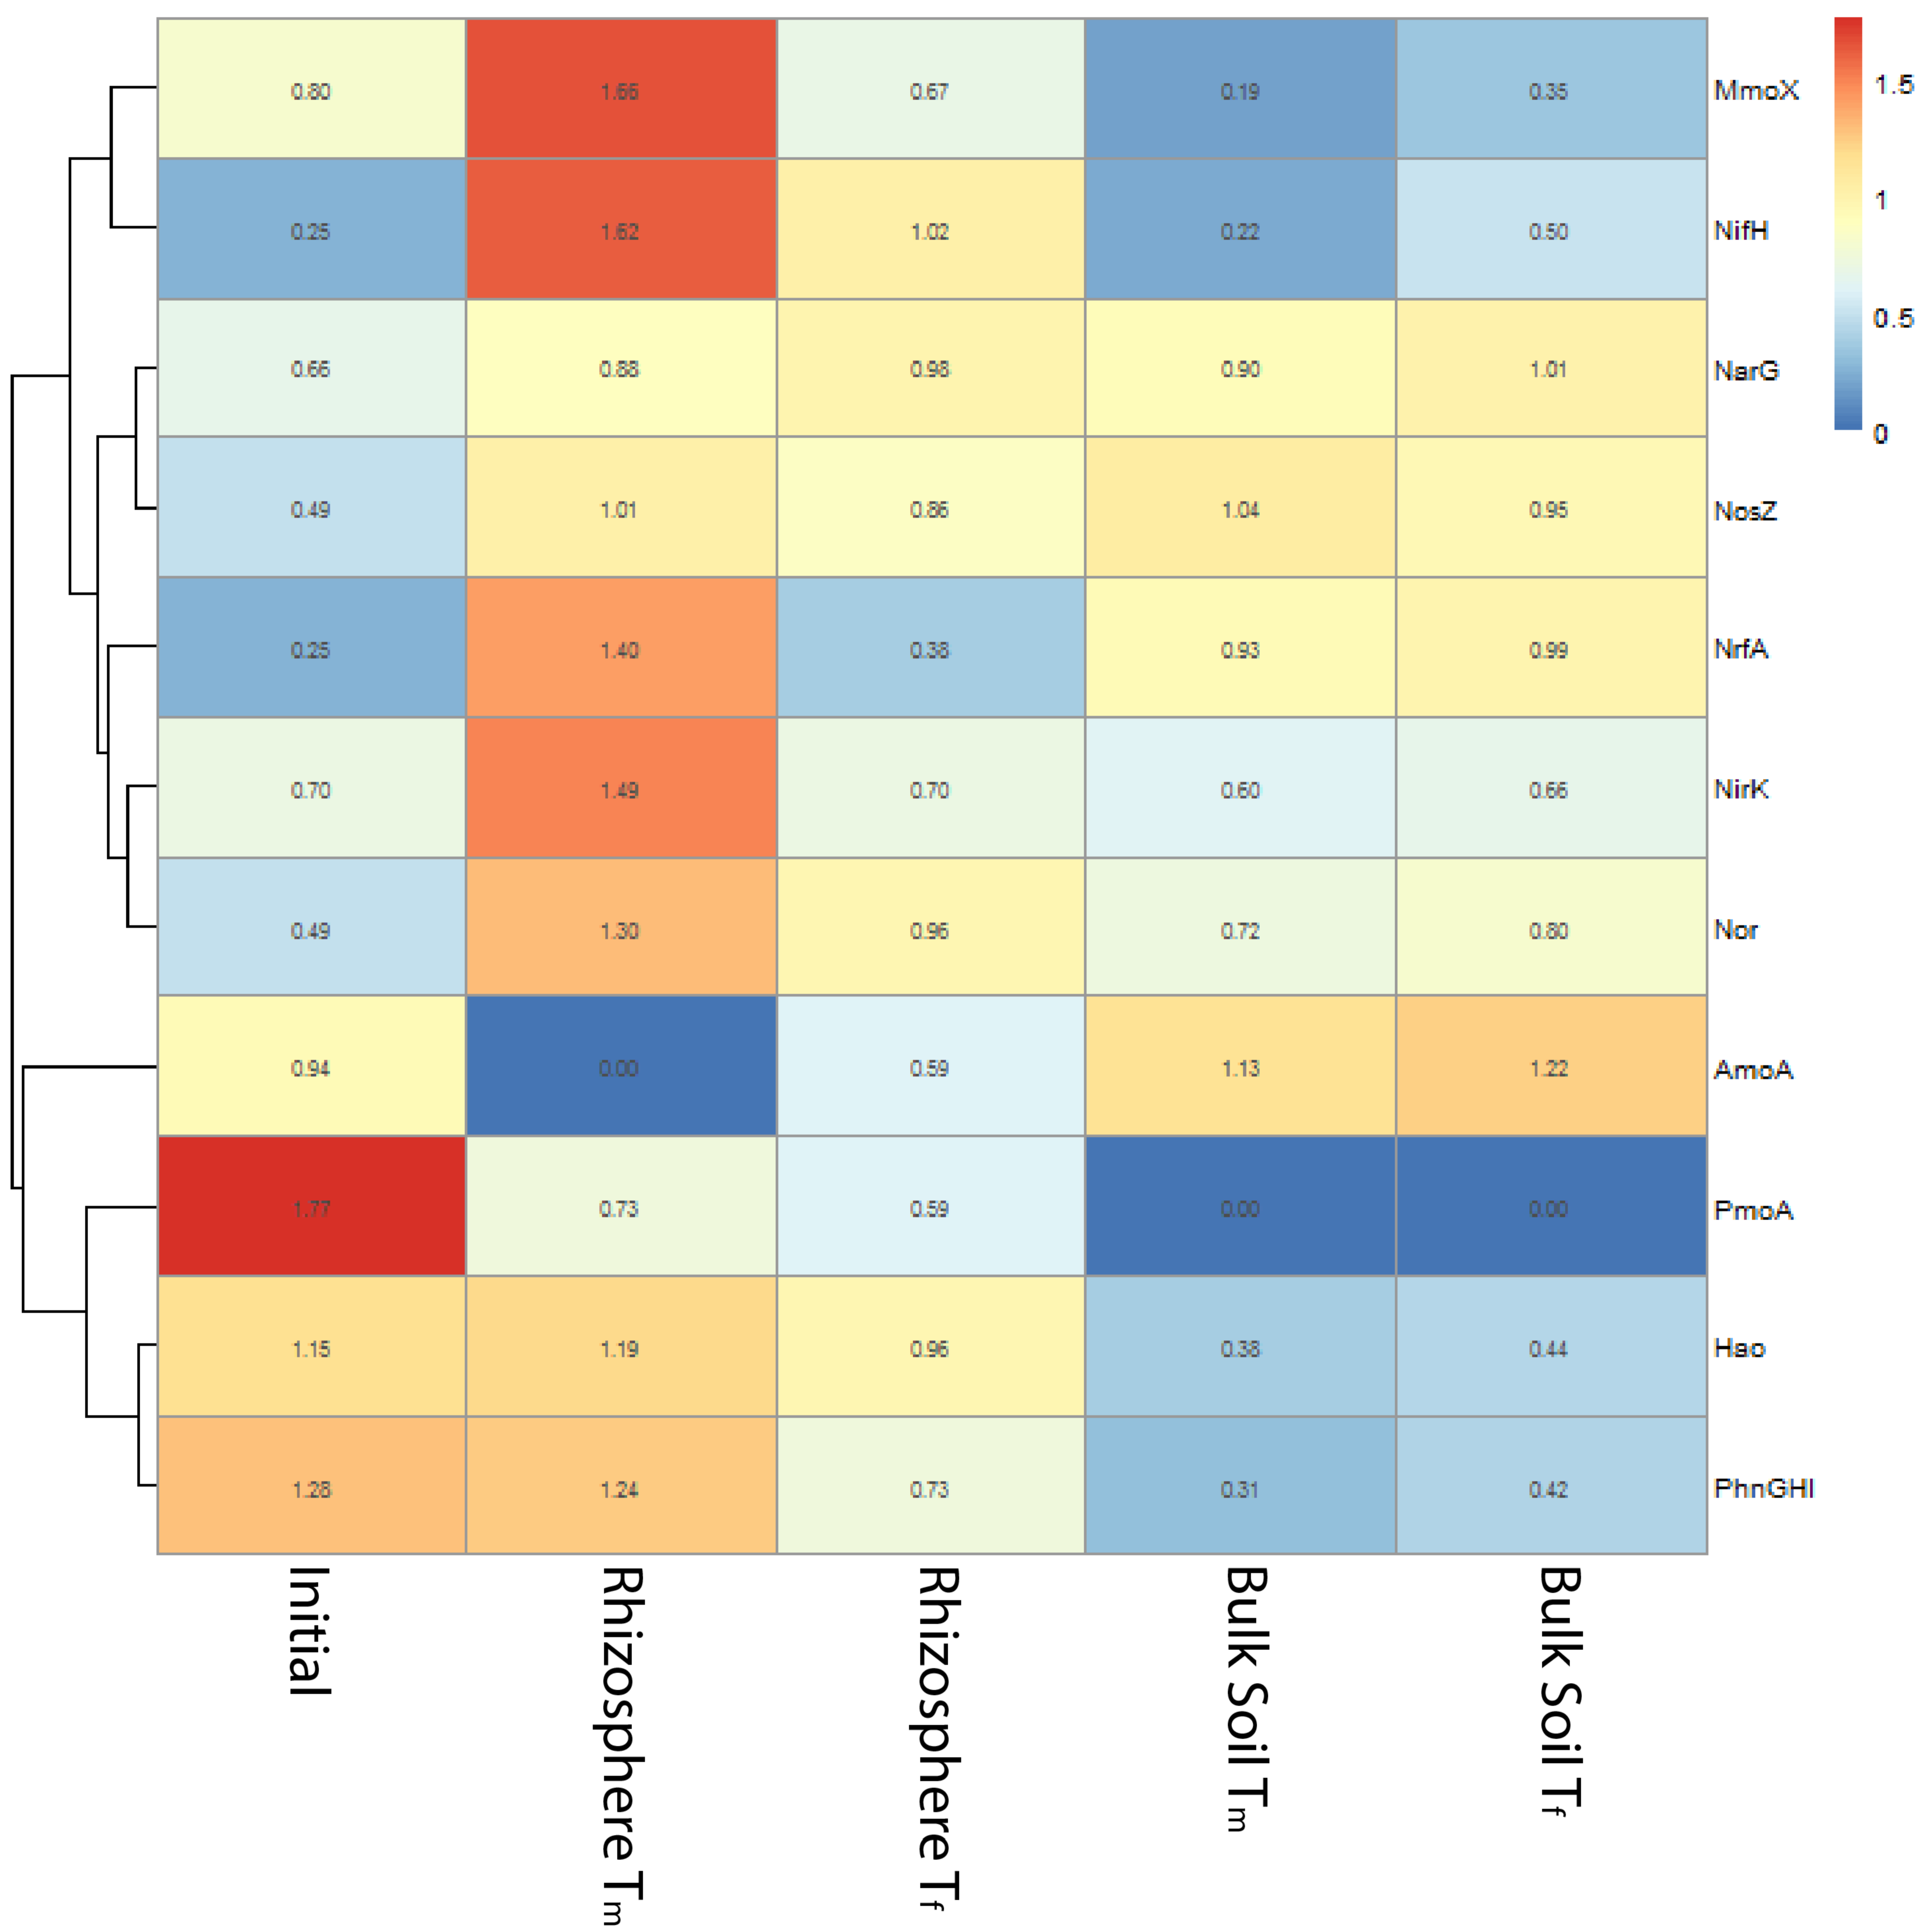

Supplement: Supplementary file [file 197855-5.pdf]
